# Supplementary material for: Long-Term Effectiveness and Drug Survival of Secukinumab in Vietnamese Patients with Psoriasis: Results from a Retrospective ENHANCE Study
Source: Springer Nature journal article supplement (doi:10.1007/s13555-022-00867-y), 2022-12-06
Supplement: MOESM1 [file 23794988]

# Long-Term Effectiveness and Drug Survival of Secukinumab in Vietnamese Patients with Psoriasis: Results from a Retrospective ENHANCE Study

Hao Trong Nguyen · Nhi Thi Uyen Pham · Tu Nguyen Anh Tran · Nguyen Nhat Pham · Yen Thi Bui · Thao Thi Phuong Vu

## Hao T. Nguyen

Ho Chi Minh City Hospital of Dermato-Venereology,  
2 Nguyen Thong, Ward Vo Thi Sau, District 3,  
Ho Chi Minh City, Vietnam

## Nguyen N. Pham

Ho Chi Minh City Hospital of Dermato-Venereology,  
2 Nguyen Thong, Ward Vo Thi Sau, District 3,  
Ho Chi Minh City, Vietnam

## Nhi T. U. Pham

Ho Chi Minh City Hospital of Dermato-Venereology,  
2 Nguyen Thong, Ward Vo Thi Sau, District 3,  
Ho Chi Minh City, Vietnam

## Yen T. Bui

Novartis Vietnam Company Limited,  
Ho Chi Minh City, 700000, Vietnam

## Tu N. A. Tran

Ho Chi Minh City Hospital of Dermato-Venereology,  
2 Nguyen Thong, Ward Vo Thi Sau, District 3,  
Ho Chi Minh City, Vietnam

## Thao T. P. Vu

Ho Chi Minh City Hospital of Dermato-Venereology,  
2 Nguyen Thong, Ward Vo Thi Sau, District 3,  
Ho Chi Minh City, Vietnam

|                                      |                                                                                                                                                  |
|--------------------------------------|--------------------------------------------------------------------------------------------------------------------------------------------------|
| Corresponding Author:                | Hao T. Nguyen<br>Ho Chi Minh City Hospital of Dermato- Venereology,<br>2 Nguyen Thong, Ward Vo Thi Sau, District 3,<br>Ho Chi Minh City, Vietnam |
| Corresponding Author e-mail address: | <a href="mailto:nthao@ump.edu.vn">nthao@ump.edu.vn</a>                                                                                           |

**Supplementary table 1: Dropout rate of secukinumab treatment and reasons for drop-out at months 12, 24, 36, and 48.**

|                                                                   | <b>Month 12<br/>(N = 232)</b> | <b>Month 24<br/>(N = 90)</b> | <b>Month 36<br/>(N = 59)</b> | <b>Month 48<br/>(N = 25)</b> |
|-------------------------------------------------------------------|-------------------------------|------------------------------|------------------------------|------------------------------|
| <b>Drop-out rate, n (%)</b>                                       | 35 (15.1)                     | 32 (35.6)                    | 16 (27.1)                    | 8 (32.0)                     |
| <b>Reasons for drop-out cases, n (%)</b>                          |                               |                              |                              |                              |
| <b>Planning for a pregnancy</b>                                   | 3 (8.6)                       | 0 (0)                        | 1 (6.2)                      | 1 (12.5)                     |
| <b>Switching to other agents or continued in another facility</b> | 4 (11.4)                      | 4 (12.5)                     | 1 (6.2)                      | 0 (0)                        |
| <b>Financial issues</b>                                           | 5 (14.3)                      | 12 (37.5)                    | 3 (18.8)                     | 2 (25.0)                     |
| <b>Adverse events</b>                                             | 1 (2.9)                       | 0 (0)                        | 0 (0)                        | 0 (0)                        |
| <b>Do not achieve the as-expected efficacy</b>                    | 2 (5.7)                       | 3 (9.4)                      | 0 (0)                        | 1 (12.5)                     |
| <b>Unknown causes/loss of follow-up</b>                           | 20 (57.1)                     | 13 (40.6)                    | 11 (68.8)                    | 4 (50.0)                     |

**Supplementary Table 2: The relationship between the patients' characteristics and the adherence to secukinumab over time**

|                                | Month 12 |         |                              | Month 24 |         |                              | Month 36 |         |                              | Month 48 |         |                          |
|--------------------------------|----------|---------|------------------------------|----------|---------|------------------------------|----------|---------|------------------------------|----------|---------|--------------------------|
|                                | Adhered  | Dropped | <i>P</i>                     | Adhered  | Dropped | <i>P</i>                     | Adhered  | Dropped | <i>P</i>                     | Adhered  | Dropped | <i>p</i>                 |
| <b>Age group</b>               |          |         | 1.000 <sup>a</sup>           |          |         | 0.327 <sup>a</sup>           |          |         | 1.000 <sup>a</sup>           |          |         | 0.595 <sup>a</sup>       |
| ≤ 65                           | 187      | 34      |                              | 118      | 62      |                              | 55       | 48      |                              | 11       | 23      |                          |
| > 65                           | 10       | 1       |                              | 5        | 5       |                              | 3        | 3       |                              | 2        | 2       |                          |
| <b>Sex</b>                     |          |         | <b>0.007<sup>b</sup></b>     |          |         | 0.155 <sup>b</sup>           |          |         | 0.494 <sup>b</sup>           |          |         | 1.000 <sup>a</sup>       |
| Male                           | 141      | 17      | RR = 1.18                    | 86       | 40      |                              | 40       | 32      |                              | 10       | 18      |                          |
| Female                         | 56       | 18      | (1.03;1.36)                  | 37       | 27      |                              | 18       | 19      |                              | 3        | 7       |                          |
| <b>Biologic state</b>          |          |         | 0.220 <sup>a</sup>           |          |         | 0.522 <sup>a</sup>           |          |         | 1.000 <sup>a</sup>           |          |         | 0.595 <sup>a</sup>       |
| Non-naïve                      | 8        | 3       |                              | 6        | 5       |                              | 4        | 4       |                              | 2        | 2       |                          |
| Naïve                          | 189      | 32      |                              | 117      | 62      |                              | 54       | 47      |                              | 11       | 23      |                          |
| <b>DMARDs state</b>            |          |         | 0.379 <sup>a</sup>           |          |         | 0.499 <sup>a</sup>           |          |         | 1.000 <sup>a</sup>           |          |         | 0.265 <sup>a</sup>       |
| Non-naïve                      | 11       | 0       |                              | 8        | 2       |                              | 3        | 2       |                              | 2        | 1       |                          |
| Naïve                          | 186      | 35      |                              | 115      | 65      |                              | 55       | 49      |                              | 11       | 24      |                          |
| <b>Concomitant PsO therapy</b> |          |         | <b>0.016<sup>b</sup></b>     |          |         | <b>0.006<sup>b</sup></b>     |          |         | <b>0.044<sup>b</sup></b>     |          |         | 0.301 <sup>a</sup>       |
| With                           | 88       | 8       | RR=1.14                      | 58       | 18      | RR=1.34                      | 28       | 15      | RR=1.43                      | 6        | 7       |                          |
| Without                        | 109      | 27      | (1.03;1.27)                  | 65       | 49      | (1.09;1.64)                  | 30       | 36      | (1.02;2.02)                  | 7        | 18      |                          |
| <b>Medical insurance</b>       |          |         | <b>&lt;0.001<sup>b</sup></b> |          |         | <b>&lt;0.001<sup>b</sup></b> |          |         | <b>&lt;0.001<sup>b</sup></b> |          |         | <b>0.004<sup>b</sup></b> |
| With                           | 171      | 20      | RR=1.41                      | 113      | 41      | RR=2.64                      | 53       | 21      | RR=5.01                      | 11       | 9       | RR=4.95                  |
| Without                        | 26       | 15      | (1,11;1,79)                  | 10       | 26      | (1,55;4,51)                  | 5        | 30      | (2,20;11,43)                 | 2        | 16      | (1,26;19,39)             |

<sup>a</sup>*P* values from the Fisher exact test.

<sup>b</sup>*P* values from the Chi-squared test.

DMARD, disease-modifying antirheumatic drug; PsO, psoriasis; RR, relative risk.

**Supplementary Figure: Kaplan-Meier plots of secukinumab drug survival over 48 months in terms of (A) age group, (B) sex, (C) biologics-naïve state, (D) DMARDs-naïve state, (E) concomitant PsO treatment, and (F) medical insurance. The p-values are from log-rank test**

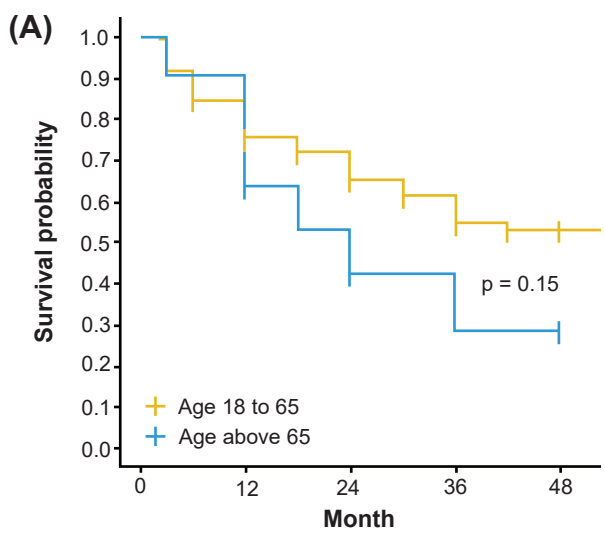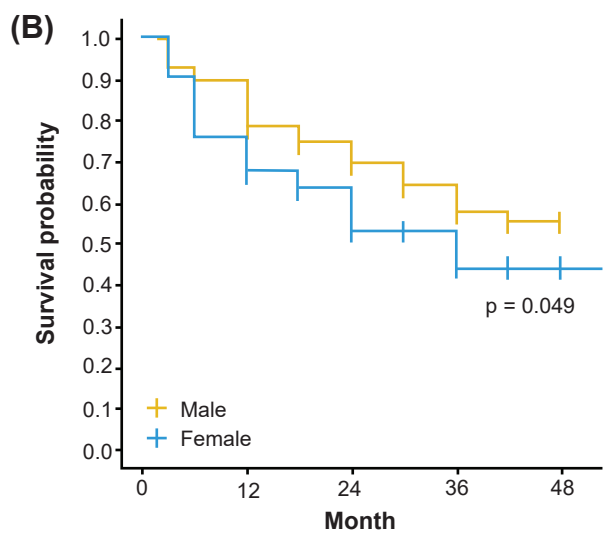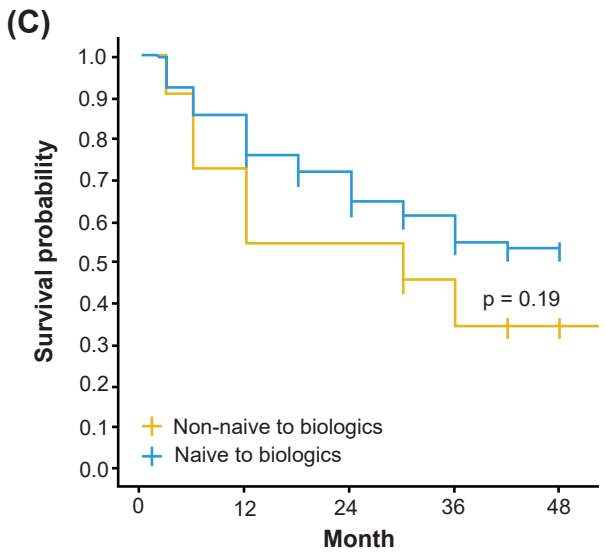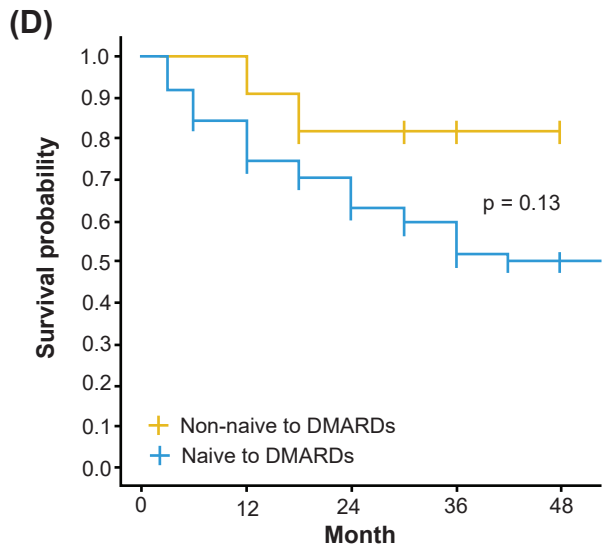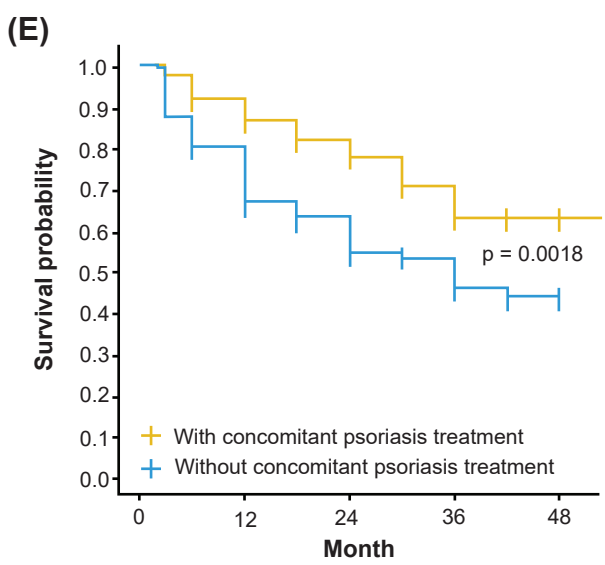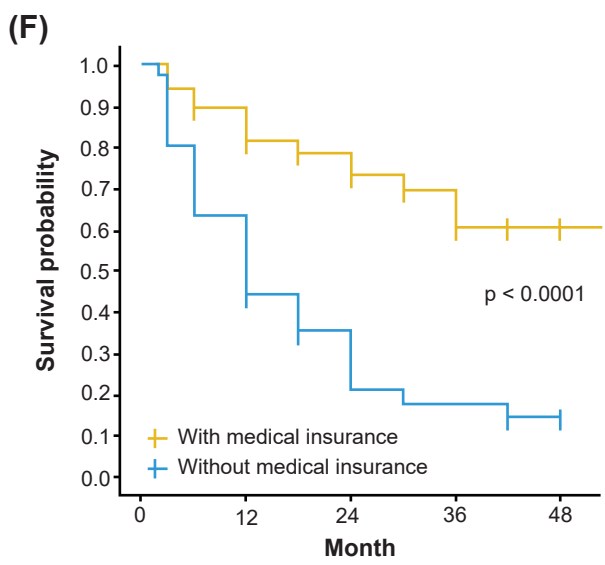

DMARD, disease-modifying antirheumatic drug; PsO, psoriasis
